# Supplementary material
Source: PubMed Central journal article supplement (PMC4865933)
Supplement: 10.1074_M116.721126_jbc.M116.721126-1.pdf [file 10.1074_M116.721126_jbc.M116.721126-1.pdf]

## **SUPPORTING INFORMATION**

### **Identification and structural characterization of an intermediate in the folding of the measles virus X domain**

Daniela Bonetti<sup>1</sup>, Carlo Camilloni<sup>2,3</sup>, Lorenzo Visconti<sup>1</sup>, Sonia Longhi<sup>4</sup>, Maurizio Brunori<sup>1</sup>, Michele Vendruscolo<sup>2</sup>, and Stefano Gianni<sup>1,2\*</sup>

<sup>1</sup>Istituto Pasteur - Fondazione Cenci Bolognetti and Istituto di Biologia e Patologia Molecolari del CNR, Dipartimento di Scienze Biochimiche “A. Rossi Fanelli”, Sapienza Università di Roma, 00185, Rome, Italy

<sup>2</sup>Department of Chemistry, University of Cambridge, Cambridge CB2 1EW, UK

<sup>3</sup>Department of Chemistry and Institute for Advanced Study, Technische Universität München, Lichtenbergstrasse 4, D-85747 Garching, Germany

<sup>4</sup>Aix-Marseille Université, Architecture et Fonction des Macromolécules Biologiques (AFMB), UMR 7257, 13288, Marseille, France; CNRS, AFMB UMR 7257, 13288, Marseille, France

### **Table of contents**

Supporting Figure S1

Supporting Figure S2

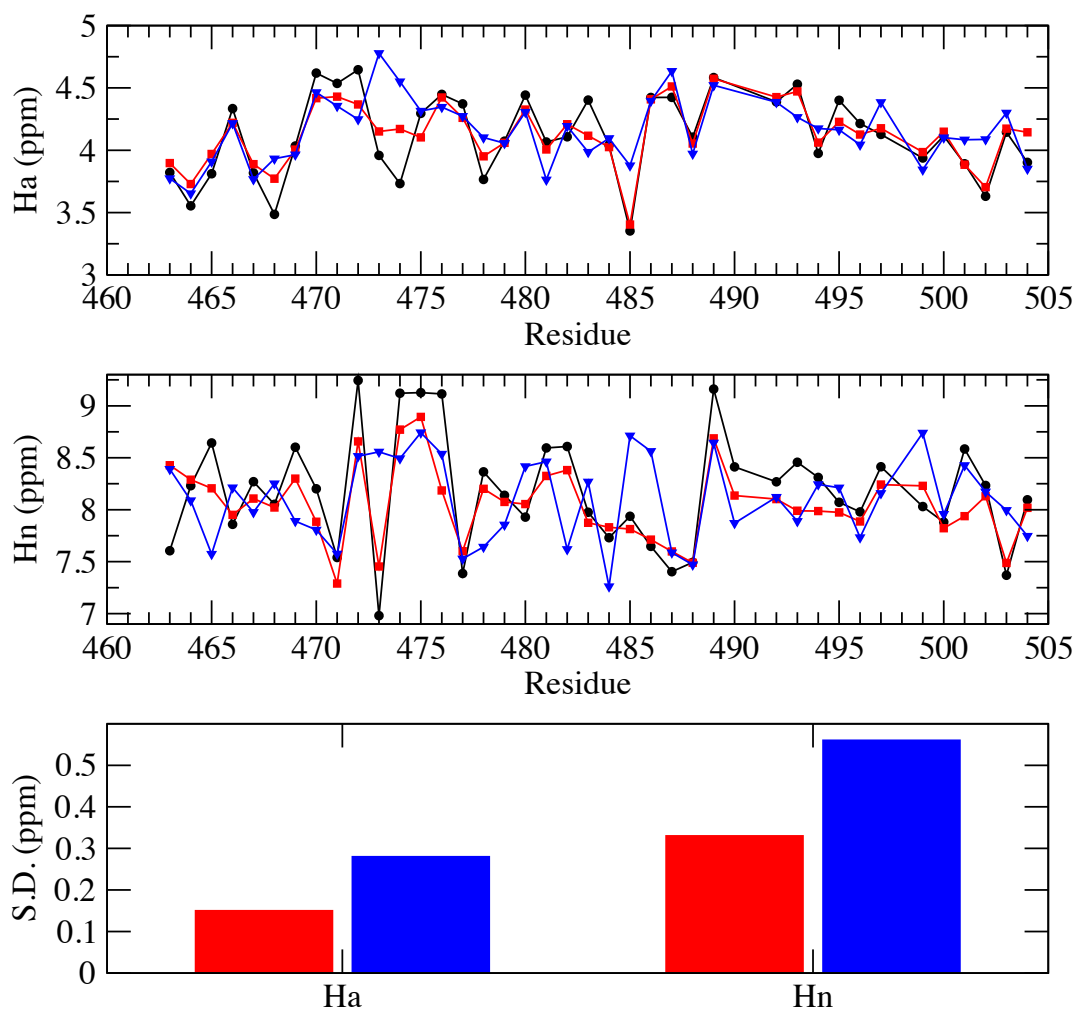

**Figure S1.** Comparison of the NMR chemical shifts of the XD domain from the ensemble generated by metadynamics (red), from the crystal structure (blue) and measured experimentally by NMR spectroscopy (black). The top panel refers to the  $H_{\alpha}$  atoms, whereas the middle panel refers to the  $H_N$  atoms. The standard deviation of the experimental chemical shifts from the model generated by metadynamics (red) and those calculated from the crystal structure (blue) is reported in the bottom panel. The values obtained from the RAM simulations resemble very closely those obtained by NMR experiments and are significantly improved compared to those calculated from the crystal structure, indicating that some effects of the dynamics of the ensemble are lost in the crystal state.

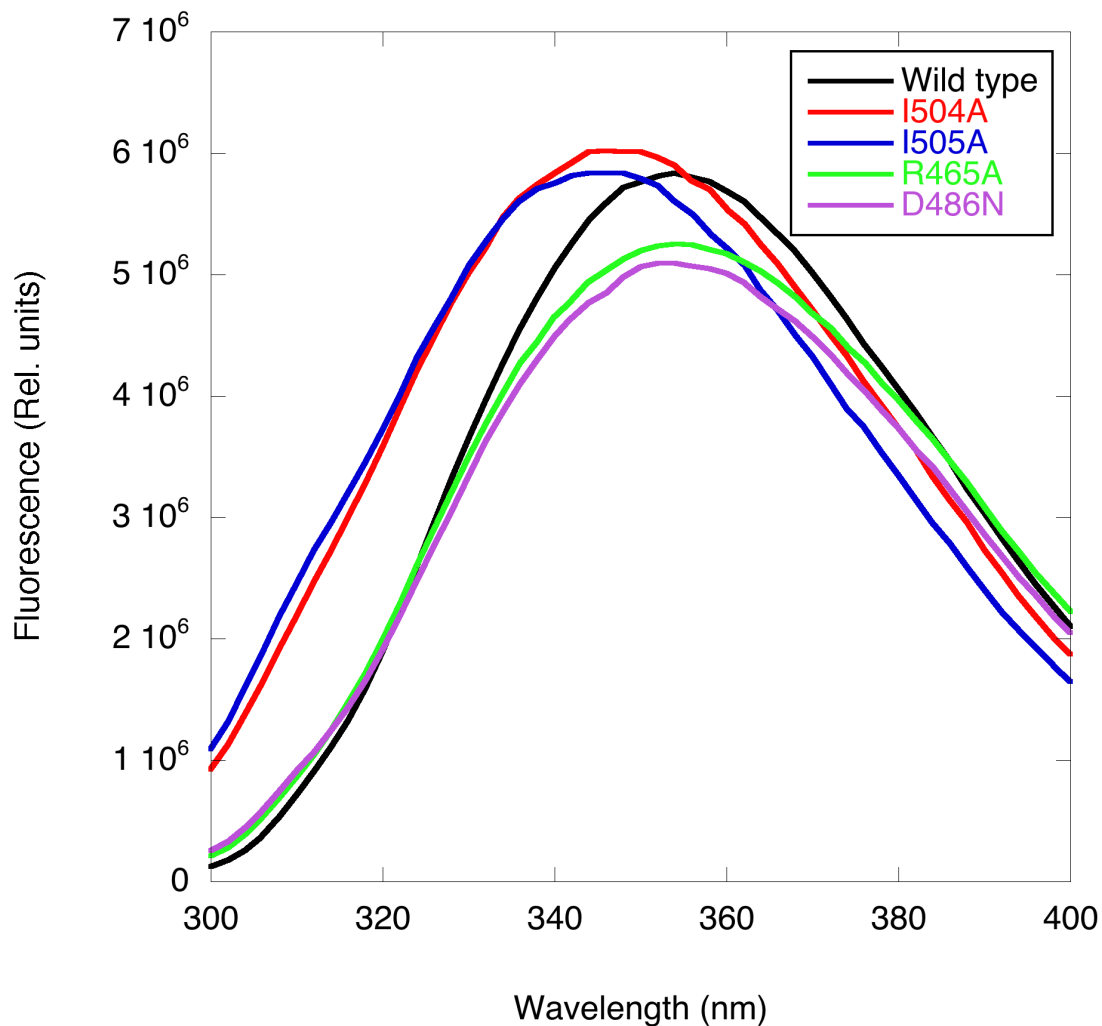

**Figure S2.** Emission spectra of XD and its site directed variants. Spectra were recorded by exciting the proteins at 280 nm, in the presence of 50 mM sodium phosphate, 300 mM NaCl at pH 7.2 and 25°C. It is evident that both the I504A and I505A mutants, which display a two-state folding transition (see text), display a blue-shifted  $\lambda_{\max}$  compared to the other variants. This finding is consistent with a shift of population from a mixture of the native and intermediate states (as in the case of wild type XD, R465A and D486N), towards the native state only.
